# Supplementary material for: Mechanism-based kinetic modeling of Cu-SSZ-13 sulfation and desulfation for NH3-SCR applications
Source: Royal Society of Chemistry journal article supplement (doi:10.1039/c8re00210j), 2018-10-26
Supplement: c8re00210j1.pdf [file c8re00210j1.pdf]

## Mechanism-based kinetic modeling of Cu-SSZ-13 sulfation and desulfation for NH<sub>3</sub>-SCR applications

Yasser Jangjou<sup>a</sup>, Chaitanya S. Sampara<sup>a</sup>, Yuntao Gu<sup>a</sup>, Di Wang<sup>b</sup>, Ashok Kumar<sup>b</sup>, Junhui Li<sup>b</sup>, and William S. Epling<sup>a</sup>

<sup>a</sup> University of Virginia, Department of Chemical Engineering, Charlottesville, VA

<sup>b</sup> Cummins Inc, Catalyst Technology, Columbus, IN

\*Address correspondence to: [wse2t@virginia.edu](mailto:wse2t@virginia.edu)

### Supporting information

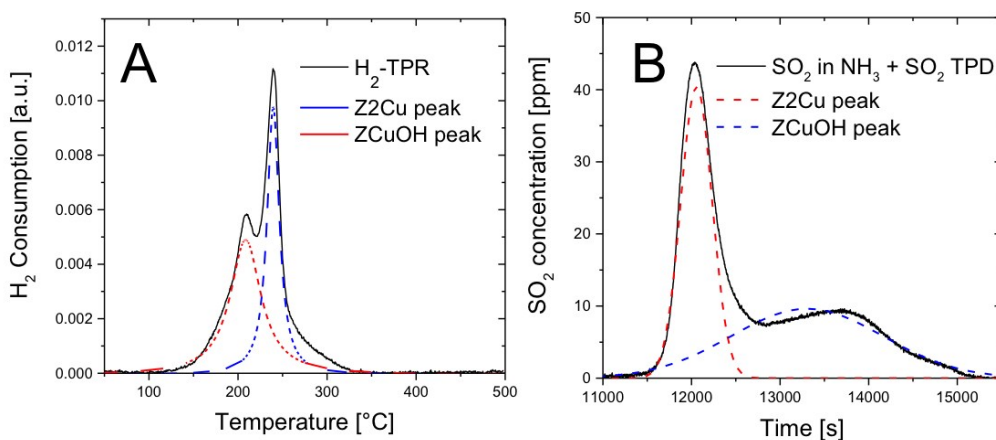

**Figure S1** (A) H<sub>2</sub>-TPR and (B) SO<sub>2</sub> in SO<sub>2</sub> + NH<sub>3</sub> TPD for commercial Cu-SSZ-13. These data were used to obtain Z<sub>2</sub>Cu and ZCuOH population values presented in the figure 1.

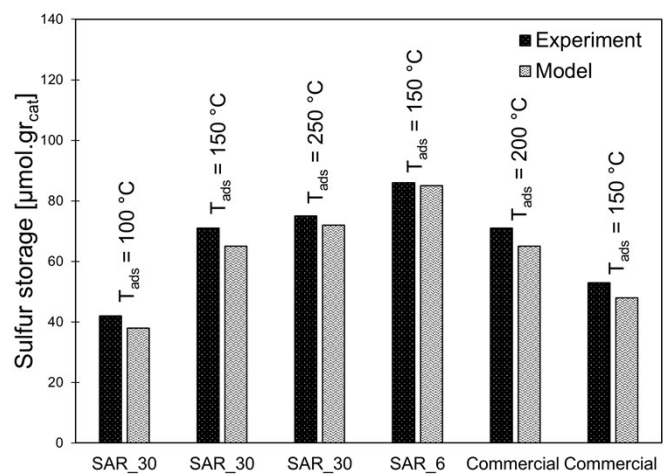

**Figure S2** Experimental data and model predictions for sulfur storage over catalyst samples used in this study.
